# Supplementary material
Source: publisher figshare collection journal article supplement (https://gsajournals.figshare.com/articles/dataset/_/6608843)
Supplement: Supplementary file 1 [file 2]

## Sheet: paqr-2 mosaic analysis
Result of the mosaic analysis of paqr-2;Ex[SUR-5::GFP(NLS) pPAQR-2] worms selected for growth to adulthood on 20 mM glucose. (+/-) indicates that the majority of the tissue was positive, while (-/+) indicates that only a minority was positive for GFP.
	1	2	3	4	5	6	7	8	9	10	11	12	13	14	15	16	17	18	19	20	21	22	23	24	25	26	27	28	29	30	31	32	33	34	35	36	37	38	39	40	41	42	43	44	45	46	47	48	49
Intestine (E)	-	-	-	-	-	-	-	-	-	-	-	-	-	-	-	-	-	-	-	-	-	-	-	-	-	-	-	-	-	-	-	-	-	-	-	-	-	-	-	-	-	-	-	-	-	-	-	-	-
Sp A (MSpppapp)	+	-	+	-	+	-	+	+	-	-	-	+	-	-	-	+	-	+	+	-	-	+	-	+	-	+	-	+	+	-	-	-	-	+	-	-	-	-	-	-	-	-	+	-	-	+	-	+	-
Sp P (MSappaap)	-	-	+	-	-	-	+	+	-	-	-	+	-	-	-	+	+	+	+	-	-	+	-	+	-	+	-	+	+	-	-	-	-	+	-	-	-	-	-	+	-	-	+	-	-	+	-	+	-
Gonad sheath A (MSpppapp)	-	-	-	-	+	-	-	+	-	-	-	+	-	-	-	+	-	-	-	-	-	-	-	-	-	+	-	-	-	-	-	-	-	+	-	-	-	-	-	-	-	-	+	-	-	-	-	-	-
Gonad sheath P (MSappaap)	-	-	+	-	-	-	+	+	-	-	-	+	-	-	-	-	+	-	+	-	-	-	-	-	-	+	-	-	-	-	-	-	-	-	-	-	-	-	-	+	-	-	+	-	-	-	-	-	-
Lateral hypodermis (ABa, ABpl, ABpr , C)	-	+	+	+	+	+	-	-	+	+	+	-	+	+	+	+	-	-	+	+	+	+	+	+	+	+	+	+	+	+	+	+	+	+	+	+	+	+	+	+	+	+	+	+	+	+	+	+	+
Ventral hypodermal ridge (ABp)	-	+	+	+	+	+	-	-	+	+	-	+	+	+	+	+	-	-	+	+	+	+	+	+	+	+	+	+	+	+	+	+	-	+	+	+	+	+	+	+	+	+	+	+	+	+	-	+	+
Ex Canal (ABplpa)	-	+	+	+	+	-	-	-	+	+	-	+	-	+	+	+	+	+	+	+	+	+	+	+	+	+	+	+	+	-	+	+	+	+	+	+	+	-	+	-	-	-	+	+	+	+	+	-	-
Procorpus (4 ABa, 2 MS)	+	+	-	+	+/-	-	-	-	+	+	-	+	+	+	+	-	+	+	+/-	+/-	+/-	-	+	+/-	+	+/-	+	+/-	+/-	-	+/-	+/-	+	+/-	-	+/-	+/-	-	+	+/-	+	+/-	+/-	+	+	+/-	+/-	+/-	+/-
Metacorpus (5 MS, 1 ABar)	-	-	-	-	+	-	+	-	-/+	-	-	-	-	-	-	-	-/+	-	+	-	+/-	-	-	+	+	+	-	+	+	-	+	-	+/-	+	-	-	-	-	-	+	+/-	+/-	+	+/-	+/-	+	+	+	-
Isthmus (4 MS, 2 ABaraa)	+/-	-	-	-	-/+	-	+	-	+/-	+/-	+/-	+	+	+	+/-	-	+/-	+	-/+	+/-	+/-	-		+/-	+/-	+/-	+/-	-/+	+/-	-	+/-	-/+	+/-	+/-	-	+	+/-	+	+	+/-	+	+/-	+/-	+	+/-	-/+	+/-	+/-	-/+
Posterior bulb (MS)	+	-	-	-	-/+	-	+	-	-	-	-	+/-	-	-	-	-	+	+	+	-	-	+/-	-	+	-	+	-	+/-	+	-	+/-	-	-	+	-	+/-	-	-	-	+	-	-	+	-	-	+	-	+	-
Hyp 10 (AB)	-	+	-	+	-	+	-	+	-	-	+	-	+	-	-	-	-	-	+	-	+	-	-	-	+	-	+	-	-	-	-	-	-	-	-	-	-	-	-	-	-	-	-	-	-	+	-	-	-
BWM Head (MS)	-	-	+	+	+	+	+	-	-	-	-	-	-	-	-	-	-	+	+	-	-	-	-	-	-	+	-	+	-	-	-	-	-	+	+	-	-	-	-	+	+	+	+	-	-	+	-	-	-
BWM Mid (D)	-	-	+	+	-	+	-	-	-	-	-	-	-	+	-	+	-	-	+	-	-	-	-	+	-	-	+	+	-	+	-	-	-	+	+	-	-	+	-	+	+	+	-	-	-	-	+	-	+
BWM Posterior (C)	-	-	-	+	-	+	-	-	-	+	-	-	-	+	-	-	-	-	-	-	-	-	-	-	-	-	-	-	-	+	-	-	-	+	+	-	-	+	-	+	-	-	-	-	-	+	+	-	+
VC2-6 neurons (ABp)	-	+	-	-	-	-	-	-	+	+	-	-	-	-	+	-	+	-	-	+	+	+	+	-	+	-	-	-	-	-	+	+	+	+	+	-	+	+	+	-	-	-	+	-	+	-	-	-	-
Head neurons (ABp)	-/+	+	+	+	+	-/+	-/+	-/+	+	+	+	+	+	+	+	+	+	+	+	+	+	+	+	+	+	+	+	+	+	+	+	+	+	+	+	+	+	+	+	+	+	+	+	+	+	+	+	+	+
VNC neurons (ABp)	-	+	+	-	+	-	-	-/+	+	+	-	+	+	+	+	+	+	+	+	+	+	+	+	+	+	+	+	+	-	-	+	+	+	+	+	+	+	+	+	-	+	+	+	+	+	+	+	+	+
Likely missing from	E, C, D, most MS, most AB	P1	E, C, most MS	E, most MS	E, C, D	E, most MS	E, C, D, most AB	E, C, D, most AB	P1	E, MS, D	P1	E, C, D	P1	E, MS	P1	E, C	E, C, D	E, C, D	E, C	P1	P1	E, C, D	P1	E, C	E, C, D, most MS	E, C, D	E, C, most MS	E, C	E, C, D	E, MS	P1	P1	P1	E	E, mostMS	E, C, D, most MS	P1	E, mostMS	P1	E	E, D, most MS	E, D, most MS	E, C, D	P1	P1	E, D	E, mostMS	E, C, D	E, mostMS
Present in	ABp, MSp	ABa, ABp	ABa, ABp, MSp	ABa, ABp, C, D	ABa, ABp, MS	ABa, ABp, C, D	ABp, MSa, MSp	ABp, MSa, MSp	ABa, ABp	C, ABa, ABp	ABa, ABp	ABp, MSa, MSp	ABa, ABp	ABa, ABp, C, D	ABa, ABp	D, ABa, ABp, MSa, MSp	ABp, MSa, MSp	ABp, MSa, MSp	D, ABa, ABp, MSa, MSp	ABa, ABp	ABa, ABp	ABa, ABp, MSa, MSp	ABa, ABp	D, ABa, ABp, MSa, MSp	ABa, ABp	ABa, ABp, MSa, MSp	D, ABa, ABp	D, ABa, ABp, MSa, MSp	ABa, ABp, MSa, MSp	ABa, ABp, C, D	ABa, ABp	ABa, ABp	ABa, ABp	C, D, ABa, ABp, MSa, MSp	C, D, ABa, ABp,	ABa, ABp	ABa, ABp	C, D, ABa, ABp,	ABa, ABp	C, D, ABa, ABp, MSa	C, ABa, ABp	C, ABa, ABp	ABa, ABp, MSa, MSp	ABa, ABp	ABa, ABp	C, ABa, ABp, MSa, MSp	C, D, ABa, ABp,	ABa, ABp, MSa, MSp	C, D, ABa, ABp,
[truncated: 1 more columns]

## Sheet: iglr-2 mosaic analysis
Result of the mosaic analysis of iglr-2;Ex[SUR-5::GFP(NLS) pIGLR-2] worms selected for growth to adulthood on 20 mM glucose. (+/-) indicates that the majority of the tissue was positive, while (-/+) indicates that only a minority was positive for GFP.
	1	2	3	4	5	6	7	8	9	10	11	12	13	14	15	16	17	18	19	20	21	22	23	24	25	26	27	28	29	30	31	32	33	34	35	36	37	38	39	40	41	42	43	44	45	46	47	48	49
Intestine (E)	-	-	-	-	-	-	-	-	-	-	-	-	-	-	-	-	-	-	-	-	-	-	-	-	-	-	-	-	-	-	-	-	-	-	-	-	-	-	-	-	-	-	-	-	-	-	-	-	-
Sp A (MSpppapp)	-	-	+	-	-	+	+	+	-	+	+	-	-	-	+	+	-	-	-	-	-	+	-	+	-	+	-	-	-	-	-	+	-	-	+	-	+	+	-	-	-	-	-	+	-	-	-	-	+
Sp P (MSappaap)	-	-	-	-	-	+	+	+	-	+	-	-	-	+	+	+	-	-	-	-	-	+	-	+	+	+	-	-	-	-	-	+	+	-	+	-	+	+	-	-	-	-	-	+	-	-	-	-	+
Gonad sheath A (MSpppapp)	-	-	-	-	-	+	+	+	-	+	-	-	-	-	-	-	-	-	-	-	-	-	-	-	-	+	-	-	-	-	-	-	-	-	-	-	+	+	-	-	-	-	-	-	-	-	-	-	+
Gonad sheath P (MSappaap)	-	-	-	-	-	+	+	+	-	+	-	-	-	+	+	+	-	-	-	-	-	-	-	-	+	+	-	-	-	-	-	+	+	-	+	-	+	+	-	-	-	-	-	+	-	-	-	-	-
Lateral hypodermis (ABa, ABpl, ABpr , C)	+	+	+	+	+	-	+	+	+	+	+	+	+	+	+	+	+	+	+	+	+	+	+	+	+	+	+	+	+	+	+	+	+	+	+	+	+	+	+	+	+	+	+	+	+	+	+	+	+
Ventral hypodermal ridge (ABp)	+	+	+	+	+	-	+	+	+	+	+	+	+	+	-/+	+	+	+	+	+	+	+	+	+	+	+	+	-	-	+	+	+	+	+	+	+	+	+	+	+	+	+	+	+	+	-	+	+	+
Ex Canal (ABplpa)	+	+	+	-	+	+	+	-	-	+	+	+	+	+	-	+	+	+	+	+	+	-	-	-	+	+	-	-	-	-	-	+	-	-	+	-	+	+	+	-	+	+	-	-	-	-	-	+	+
Procorpus (4 ABa, 2 MS)	-	+	-	+/-	-/+	+/-	+/-	+	-	+/-	+/-	+/-	+/-	+	+	+/-	+/-	+	+	+/-	+	+	+	+/-	+/-	+/-	-	+/-	+	+/-	+/-	+/-	+/-	+	+	-	+/-	-	+/-	+	+/-	+/-	-	+/-	+	+	+/-	+/-	-
Metacorpus (5 MS, 1 ABar)	-	-	-	-	-	+	+	+	-	+	+	-	-	-	+	+	-	-	-	-	-	+	-	+	-	+	-	-	+	-	-	+	+	-	-	-	+	+	-/+	-	-	-	-/+	+	-	-	-	-	-
Isthmus (4 MS, 2 ABaraa)	-	-	-	+	-	+	+/-	-	-	-	+	-	-	-	+	+	+/-	+/-	+	+/-	-	+	-	+/-	-	-/+	-	-/+	+	-/+	+/-	+/-	-/+	+	+/-	-	-/+	+/-	+/-	+	+/-	-	-	+/-	-/+	+/-	+/-	+/-	-
Posterior bulb (MS)	-	-	-	+/-	-	+	+	+	-	+	+	-	-	-	+	+	+/-	+/-	-	-	-	+	-	+	+/-	+	-	-	-	-/+	-	+	+	-	+/-	-	+	+	-	-	-	-	-	+/-	-	-	-	-	-
Hyp 10 (AB)	+	+	-	-	+	-	-	-	-	-	-	-	-/+	-	+	-	+	+	-	-	+	+	-	-	-	-	-	+	-	+	+	-	-	-	-	-	+	-	-	-	+	-	+	-	-	-	+	+	-
BWM Head (MS)	-	-	+	-	-	-	+	+	-	-	+	-	+	-	+	+	-	-	-	-	-	+	+	-	+	+	+	-	-	-	+	-	+	-	-	-	+	+	+	-	+	+	+	+	-	-	+	+	-
BWM Mid (D)	+	-	+	-	-	-	+	+	-	-	-	-	+	-	+	+	-	-	-	-	-	+	+	-	-	+	+	-	-	-	+	-	+	-	+	-	-	+	-	-	+	+	+	-	-	-	+	+	+
BWM Posterior (C)	+	-	-	-	-	+	+	+	-	-	-	-	-	-	-	+	-	-	-	-	-	+	-	+	+	+	-	-	-	-	+	-	+	-	-	-	+	+	+	-	-	+	+	+	-	-	+	+	-
VC2-6 neurons (ABp)	-	+	+	-	-	-	-	-	-	-	-	-	-	+	-	+	+	+	-	-	+	-	-	-	-	-	+	-	-	-	-	-	-	-	-	-	-	-	+	-	-	+	+	-	-	-	-	-	-
Head neurons (ABp)	+	+	+	+	+	+	+	+	-	+	+	+	+	+	+	+	+	+	+	+	+	+	+	+	+	+	+	+	+	+	+	+	+	+	+	+	+	+	+	+	+	+	+	+	+	+	+	+	+
VNC neurons (ABp)	+	+	+	+	+	+	+	+	-	+	+	-	+	+	+	+	+	+	+	-	+	-	+	-	-	+	+	+	+	+	+	+	+	+	+	-	+	+	+	+	+	+	+	+	+	+	-	-	+
Likely missing from	E, MS	P1	E, C	E, C, D,	P1	E, D, most Aba	E	E	P1	E, C, D	E, C, D,	P1	E, C	E, C, D,	E, C	E	E, C, D,	E, C, D,	E, C, D, most MS	P1	P1	E	E, C, most MS	E, D	E, D	E	E, C	P1	E, C, D	P1	E	E, C, D	E	E, C, D, most MS	E, C	P1	E, D	E	E, D	E, C, D	E, C	E	E	E, D	P1	P1	E	E	E, D
Present in	C, D, ABa, ABp,	ABa, ABp	D, ABa, ABp, MS	ABa, Abp, MS	ABa, ABp	C, ABp, MSa, MSp	C, D, ABa, ABp, MSa, MSp	C, D, ABa, ABp, MSa, MSp	Aba, Abp	ABa, ABp, MSa, MSp	ABa, Abp, MS	ABa, ABp	D, ABa, Abp, MS	ABa, Abp, MSa	D, ABa, ABp, MSa, MSp	C, D, ABa, ABp, MSa, MSp	ABa, Abp, MS	ABa, Abp, MS	ABa, ABp	ABa, ABp	ABa, ABp	C, D, ABa, ABp, MSa, MSp	D, ABa, ABp,	C, ABa, ABp, MSa, MSp	C, ABa, ABp, MSa, MSp	C, D, ABa, ABp, MSa, MSp	D, Aba, Abp, MS	ABa, ABp	Aba, Abp, MS	ABa, ABp	C, D, ABa, ABp, MS	ABa, ABp, MSa, MSp	C, D, ABa, ABp, MS	ABa, ABp	D, Aba, Abp, MS	Aba, Abp	C, ABa, ABp, MSa, MSp	C, D, ABa, ABp, MSa, MSp	C, Aba, Abp, MS	Aba, Abp, MS	D, Aba, Abp, MS	C, D, ABa, Abp, MS	C, D, ABa, Abp, MS	C, ABa, ABp, MSa, MSp	Aba, Abp	Aba, Abp	C, D, Aba, Abp, MS	C, D, Aba, Abp, MS	C, Aba, Abp, MSa, MSp
[truncated: 1 more columns]
